# Supplementary material for: Therapeutic Potential of an Endolysin Derived from Kayvirus S25-3 for Staphylococcal Impetigo
Source: Viruses. 2019 Aug 22;11(9):769. doi: 10.3390/v11090769 (PMC6784202; doi:10.3390/v11090769)
Supplement: Supplementary file 1 [file viruses-11-00769-s001.pdf]

**Table S1.** *S. aureus* strains used in this study.

| Strain | Origin                         | ST <sup>a</sup> | CC <sup>b</sup> | <i>mecA</i> <sup>c</sup> | SCC <i>mec</i> <sup>d</sup> | Virulence genes        |                         |                          | Reaction rate<br>( $\Delta$ OD <sub>595</sub> /mg/ml) | Reference  |
|--------|--------------------------------|-----------------|-----------------|--------------------------|-----------------------------|------------------------|-------------------------|--------------------------|-------------------------------------------------------|------------|
|        |                                |                 |                 |                          |                             | <i>et</i> <sup>c</sup> | <i>pvl</i> <sup>c</sup> | <i>tsst</i> <sup>c</sup> |                                                       |            |
| COL    | HA-MRSA reference strain       | 250             | 5               | +                        | I                           | <i>etb</i>             | -                       | +                        | 2.678                                                 | [24]       |
| N315   | HA-MRSA reference strain       | 5               | 5               | +                        | II                          | -                      | +                       | -                        | 4.467                                                 | [25]       |
| TF3030 | Clinical isolation             | 30              | 30              | +                        | IVc                         | <i>etb</i>             | +                       | +                        | 5.333                                                 | [26]       |
| TY825  | Clinical isolation             | 1442            | 89              | +                        | IVc                         | <i>etb</i>             | -                       | -                        | 4.867                                                 | [27]       |
| N1     | Clinical isolation             | 4686            | 630             | +                        | IVc                         | <i>etb</i>             | -                       | +                        | 2.889                                                 | [28]       |
| TY767  | Clinical isolation             | 121             | 121             | +                        | V                           | <i>eta/etb</i>         | -                       | -                        | 8.356                                                 | This study |
| N2     | Clinical isolation             | 1155            | 101             | +                        | N.E.                        | <i>etb</i>             | -                       | -                        | 2.711                                                 | [28]       |
| N3     | Nasal cavity of atopic patient | 4684            | 629             | +                        | N.E.                        | -                      | -                       | -                        | 1.533                                                 | This study |
| N4     | Nasal cavity of atopic patient | 4685            | 30              | -                        | -                           | -                      | +                       | +                        | 4.889                                                 | This study |

<sup>a</sup> MLST profile was determined as described previously (J Clin Microbiol 38:1008-1015, 2000, <https://jcm.asm.org/content/38/3/1008.long>).

<sup>b</sup> Clonal complexes were determined using the eBURST (J Bacteriol 186:1518-1530, 2004, doi:10.1128/jb.186.5.1518-1530.2004).

<sup>c</sup> PCR targeted *mecA*, *pvl*, *tsst*, and *et* gene including *eta*, *etb*, and *etd* was performed by Hisata's method (J Clin Microbiol 43:3364-3372, 2005, doi:10.1128/JCM.43.7.3364-3372.2005). Six *S. aureus* strains were subjected to PCR to determine SCC *mec* typing (J Antimicrob Chemother 60:42-48, 2007, doi:10.1093/jac/dkm112).

Abbreviations: ST, Sequence typing; CC, Clonal complex; *et*, exfoliative toxin gene; *pvl*, Pantone-Valentine leucocidin gene; *tsst*, toxic shock syndrome toxin gene; N.E., not examined.

**Table S2.** Collection of human cutaneous bacteria used in this study

| Strains                      | Origin       | Culture media <sup>a</sup> | Reaction rate<br>( $\Delta OD_{595}/\text{mg/ml}$ ) | Reference  | Strains                           | Origin             | Culture media <sup>a</sup> | Reaction rate<br>( $\Delta OD_{595}/\text{mg/ml}$ ) | Reference  |
|------------------------------|--------------|----------------------------|-----------------------------------------------------|------------|-----------------------------------|--------------------|----------------------------|-----------------------------------------------------|------------|
| <i>Staphylococcus aureus</i> |              |                            |                                                     |            | <i>Staphylococcus epidermidis</i> |                    |                            |                                                     |            |
| B1                           | Left forearm | TSA                        | 5.356                                               | This study | ATCC12228                         | Clinical isolation | TSA                        | 2.685                                               | [24]       |
| B3                           | Left forearm | TSA                        | 5.844                                               | This study | W860371                           | Clinical isolation | TSA                        | 1.156                                               | This study |
| B4                           | Left forearm | TSA                        | 4.6                                                 | This study | M890190                           | Clinical isolation | TSA                        | 0.844                                               | This study |
| B7                           | Left forearm | TSA                        | 3.022                                               | This study | A1                                | Forehead           | BHK                        | 0.089                                               | This study |
| B8                           | Left forearm | TSA                        | 5.156                                               | This study | A2                                | Forehead           | BHK                        | 0                                                   | This study |
| B9                           | Left forearm | TSA                        | 5.044                                               | This study | A3                                | Forehead           | BHK                        | 2.9                                                 | This study |
| B10                          | Left forearm | TSA                        | 4.6                                                 | This study | A6                                | Forehead           | BHK                        | 0.178                                               | This study |
| B11                          | Left forearm | TSA                        | 6.444                                               | This study | A7                                | Forehead           | BHK                        | 0.933                                               | This study |
| B12                          | Left forearm | TSA                        | 5.8                                                 | This study | A9                                | Forehead           | BHK                        | 0.733                                               | This study |
| B13                          | Left forearm | TSA                        | 6.311                                               | This study | A15                               | Forehead           | BHK                        | 0                                                   | This study |
| B14                          | Left forearm | TSA                        | 3.511                                               | This study | A17                               | Forehead           | BHK                        | 1.356                                               | This study |
| B15                          | Left forearm | TSA                        | 5.733                                               | This study | A22                               | Forehead           | BHK                        | 0                                                   | This study |
| B17                          | Left forearm | TSA                        | 7.778                                               | This study | A23                               | Forehead           | BHK                        | 0.711                                               | This study |
| B18                          | Left forearm | TSA                        | 6                                                   | This study | A24                               | Forehead           | BHK                        | 0                                                   | This study |
| B19                          | Left forearm | TSA                        | 3.111                                               | This study | A25                               | Forehead           | BHK                        | 0                                                   | This study |
| B20                          | Left forearm | TSA                        | 4.8                                                 | This study | A27                               | Forehead           | BHK                        | 0.822                                               | This study |
| B21                          | Left forearm | TSA                        | 3.022                                               | This study | A28                               | Forehead           | BHK                        | 0                                                   | This study |
| B22                          | Left forearm | TSA                        | 3.867                                               | This study | A29                               | Forehead           | BHK                        | 0.489                                               | This study |
| B24                          | Left forearm | TSA                        | 2.867                                               | This study | A30                               | Forehead           | BHK                        | 0.711                                               | This study |
| B30                          | Left forearm | TSA                        | 1.632                                               | This study | A31                               | Forehead           | BHK                        | 0                                                   | This study |
| B31                          | Left forearm | TSA                        | 8.733                                               | This study | A33                               | Forehead           | BHK                        | 0.822                                               | This study |
| B40                          | Left forearm | TSA                        | 0                                                   | This study | C6                                | Dorsal skin        | HTA                        | 0.655                                               | This study |
|                              |              |                            |                                                     |            | C8                                | Dorsal skin        | HTA                        | 0                                                   | This study |
|                              |              |                            |                                                     |            | C9                                | Dorsal skin        | HTA                        | 0.844                                               | This study |
|                              |              |                            |                                                     |            | C10                               | Dorsal skin        | HTA                        | 0.489                                               | This study |
|                              |              |                            |                                                     |            | C11                               | Dorsal skin        | HTA                        | 2.508                                               | This study |
|                              |              |                            |                                                     |            | C12                               | Dorsal skin        | HTA                        | 0.956                                               | This study |

**Table S2.** Collection of human cutaneous bacteria used in this study

| Strains                          | Origin             | Culture media <sup>a</sup> | Reaction rate<br>( $\Delta OD_{595}/\text{mg/ml}$ ) | Reference  | Strains                       | Origin             | Culture media <sup>a</sup> | Reaction rate<br>( $\Delta OD_{595}/\text{mg/ml}$ ) | Reference  |
|----------------------------------|--------------------|----------------------------|-----------------------------------------------------|------------|-------------------------------|--------------------|----------------------------|-----------------------------------------------------|------------|
| <i>Staphylococcus schleiferi</i> |                    |                            |                                                     |            | <i>Pseudomonas aeruginosa</i> |                    |                            |                                                     |            |
| B2                               | Left forearm       | TSA                        | 2.556                                               | This study | MS5639                        | Clinical isolation | LB                         | 0.089                                               | This study |
| B6                               | Left forearm       | TSA                        | 4.067                                               | This study | MS5640                        | Clinical isolation | LB                         | 0.6                                                 | This study |
| B16                              | Left forearm       | TSA                        | 2.444                                               | This study | MS5641                        | Clinical isolation | LB                         | 0.867                                               | This study |
| <i>Staphylococcus capitis</i>    |                    |                            |                                                     |            | PAO1                          | Clinical isolation | LB                         | 0.622                                               | [30]       |
| A5                               | Forehead           | BHK                        | 0.363                                               | This study | D4                            | Clinical isolation | LB                         | 0                                                   | [30]       |
| A12                              | Forehead           | BHK                        | 0                                                   | This study | S10                           | Clinical isolation | LB                         | 0.911                                               | [30]       |
| A18                              | Forehead           | BHK                        | 5.378                                               | This study | PA29                          | Clinical isolation | LB                         | 0.867                                               | [30]       |
| A19                              | Forehead           | BHK                        | 0.822                                               | This study | <i>Bacillus cereus</i>        |                    |                            |                                                     |            |
| A26                              | Forehead           | BHK                        | 0                                                   | This study | B23                           | Left forearm       | TSA                        | 0.24                                                | This study |
| A32                              | Forehead           | BHK                        | 0                                                   | This study | B25                           | Left forearm       | TSA                        | 0.178                                               | This study |
| A36                              | Forehead           | BHK                        | 0                                                   | This study | B27                           | Left forearm       | TSA                        | 0                                                   | This study |
| B34                              | Left forearm       | TSA                        | 1.644                                               | This study | B28                           | Left forearm       | TSA                        | 0                                                   | This study |
| <i>Staphylococcus hominis</i>    |                    |                            |                                                     |            | B29                           | Left forearm       | TSA                        | 0                                                   | This study |
| A10                              | Forehead           | BHK                        | 2.578                                               | This study | B32                           | Left forearm       | TSA                        | 0                                                   | This study |
| A13                              | Forehead           | BHK                        | 0.422                                               | This study | B33                           | Left forearm       | TSA                        | 0                                                   | This study |
| B26                              | Left forearm       | TSA                        | 3.356                                               | This study | B35                           | Left forearm       | TSA                        | 0                                                   | This study |
| <i>Streptococcus mitis</i>       |                    |                            |                                                     |            | B36                           | Left forearm       | TSA                        | 0                                                   | This study |
| GTC495                           | Clinical isolation | TSA                        | 0.178                                               | [29]       | B37                           | Left forearm       | TSA                        | 0                                                   | This study |
|                                  |                    |                            |                                                     |            | B38                           | Left forearm       | TSA                        | 0                                                   | This study |
|                                  |                    |                            |                                                     |            | B39                           | Left forearm       | TSA                        | 0                                                   | This study |
|                                  |                    |                            |                                                     |            | <i>Bacillus pumilus</i>       |                    |                            |                                                     |            |
|                                  |                    |                            |                                                     |            | B5                            | Left forearm       | TSA                        | 0                                                   | This study |
|                                  |                    |                            |                                                     |            | <i>Bacillus subtilis</i>      |                    |                            |                                                     |            |
|                                  |                    |                            |                                                     |            | C2                            | Dorsal skin        | HTA                        | 0                                                   | This study |

**Table S2.** Collection of human cutaneous bacteria used in this study

| Strains                             | Origin      | Culture media <sup>a</sup> | Reaction rate<br>( $\Delta OD_{595}/\text{mg/ml}$ ) | Reference  | Strains                    | Origin      | Culture media <sup>a</sup> | Reaction rate<br>( $\Delta OD_{595}/\text{mg/ml}$ ) | Reference  |
|-------------------------------------|-------------|----------------------------|-----------------------------------------------------|------------|----------------------------|-------------|----------------------------|-----------------------------------------------------|------------|
| <i>Corynebacterium</i> spp.         |             |                            |                                                     |            | <i>Micrococcus</i> spp.    |             |                            |                                                     |            |
| C14                                 | Dorsal skin | HTA                        | 0.578                                               | This study | C1                         | Dorsal skin | HTA                        | 0                                                   | This study |
| C15                                 | Dorsal skin | HTA                        | 0.2                                                 | This study | C7                         | Dorsal skin | HTA                        | 0                                                   | This study |
| C16                                 | Dorsal skin | HTA                        | 0.622                                               | This study | <i>Brevibacterium</i> spp. |             |                            |                                                     |            |
| C17                                 | Dorsal skin | HTA                        | 0.844                                               | This study | C3                         | Dorsal skin | HTA                        | 0                                                   | This study |
| C18                                 | Dorsal skin | HTA                        | 0.422                                               | This study | C5                         | Dorsal skin | HTA                        | 0                                                   | This study |
| C19                                 | Dorsal skin | HTA                        | 0.422                                               | This study |                            |             |                            |                                                     |            |
| C20                                 | Dorsal skin | HTA                        | 0                                                   | This study |                            |             |                            |                                                     |            |
| <i>Propionibacterium acnes</i>      |             |                            |                                                     |            |                            |             |                            |                                                     |            |
| A4                                  | Forehead    | BHK                        | 0.044                                               | This study |                            |             |                            |                                                     |            |
| A20                                 | Forehead    | BHK                        | 0                                                   | This study |                            |             |                            |                                                     |            |
| Other <i>Propionibacterium</i> spp. |             |                            |                                                     |            |                            |             |                            |                                                     |            |
| A11                                 | Forehead    | BHK                        | 0.244                                               | This study |                            |             |                            |                                                     |            |
| A34                                 | Forehead    | BHK                        | 0                                                   | This study |                            |             |                            |                                                     |            |

<sup>a</sup>, Tryptic Soy Agar, TSA; Luria-Bertani media, LB; Brucella HK medium, BHK; Hoyle's tellurite agar, HTA.

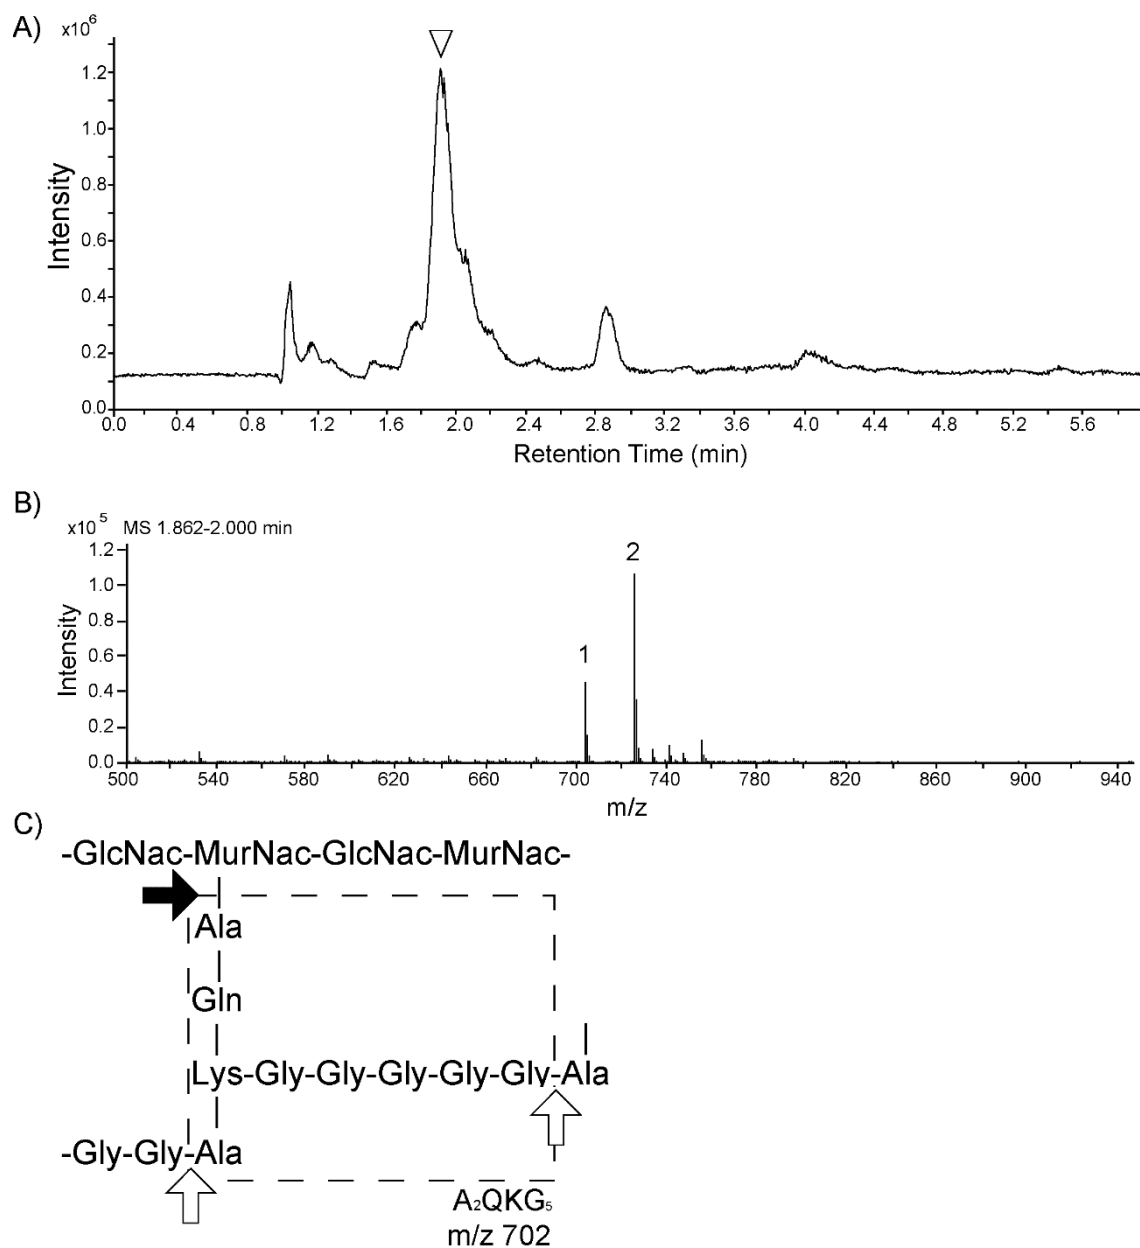

**Figure S1.** Analysis of *S. aureus* peptidoglycan reacted with S25-3LYS-his, using liquid chromatography coupled with quadrupole time-of-flight mass spectrometry (QTOF). 2.5 mg/ml of the *S. aureus* peptidoglycan (Sigma-Aldrich, St. Louis, MO, USA) was incubated with 100  $\mu$ g/ml of S25-3LYS-his at 37°C during 2 h. The digested products were separated by liquid chromatography, using an Agilent 1260 HPLC system equipped with Advance Bio Peptide Map column (1.0  $\times$  150 mm, 2.7  $\mu$ m). Two elution buffers (A, 0.1% Formic acid in water; B, 0.1% Formic acid in acetonitrile) were used with a linear gradient of buffer B (2-95%) for 10 min. After separation by liquid chromatography, the peaks were analyzed by mass spectrometry. Agilent 6530 Q-TOF LCMS System (Agilent

Technologies, Santa Clara, CA, USA) was used in this analysis. (A) Chromatograph of *S. aureus* peptidoglycan digested by S25-3LYS-his. The peak indicated by an arrowhead was subjected to mass spectrometry (MS). (B) Mass spectra of *S. aureus* peptidoglycan separated by liquid chromatography. The detected masses at peaks 1 and 2 are 702.3522 m/z and 724.3342 m/z, respectively. According to the further MS/MS analyses, peaks 1 and 2 are considered to be hydrogen and sodium adducts of A<sub>2</sub>QKG<sub>5</sub>, respectively. (C) Schematic diagram of S25-3LYS-his cleaved sites of *S. aureus* peptidoglycan. The linkages cleaved by S25-3LYS-his are shown by arrows. Based on the results above, the S25-3LYS-his were shown to have both an *N*-acetylmuramoyl-L-alanine amidase activity (black arrow) and a D-alanyl-glycyl endopeptidase activity (white arrow).

Turbidity change by S25-3LYS-his or control-lysate treatment between 0 min and X min is put as  $\Delta OD_{595}^{\text{S25-3LYS-his or Control solution}}_{[X \text{ min}]}$

Bacterial concentration change by S25-3LYS-his or control-solution treatment between 0 min and X min is put as  $\Delta CFU/ml^{\text{S25-3LYS-his or Control solution}}_{[X \text{ min}]}$

$$\text{A) Rate of turbidity reduction} = \frac{\Delta OD_{595}^{\text{S25-3LYS-his}}_{[X \text{ min}]} - \Delta OD_{595}^{\text{Control solution}}_{[X \text{ min}]}}{(\Delta OD_{595})}$$

$$\text{B) Rate of bacterial reduction} = \frac{\Delta CFU/ml^{\text{S25-3LYS-his}}_{[X \text{ min}]} - \Delta CFU/ml^{\text{Control solution}}_{[X \text{ min}]}}{(\Delta CFU/ml)}$$

$$\text{C) Reaction rate of S25-3LYS-his} = \frac{\Delta OD_{595}^{\text{S25-3LYS-his}}_{[15 \text{ min}]}}{(\Delta OD_{595}/\text{min}/\text{mg}) \cdot 15 \text{ (min)} / \text{Amount of S25-3LYS-his (mg)}}$$

**Figure S2.** Mathematical formula for (A) rate of turbidity reduction, (B) rate of bactericidal reduction, and (C) reaction rate of S25-3LYS-his. The units are enclosed with round brackets.

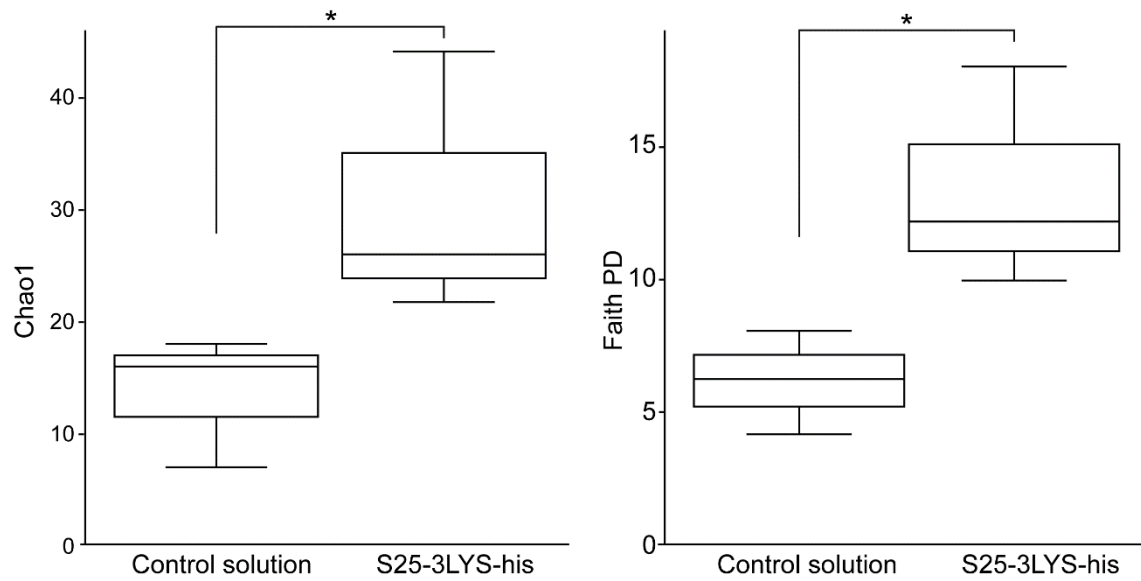

**Figure S3.** Alpha diversity of mouse pinna microbiome. The S25-3LYS-his-treated group was compared with control solution-treated group. On the left and right, the Chao1 and Faith-PD metrics are shown, respectively. The statistical significance is indicated as “\*” ( $P < 0.05$ ).

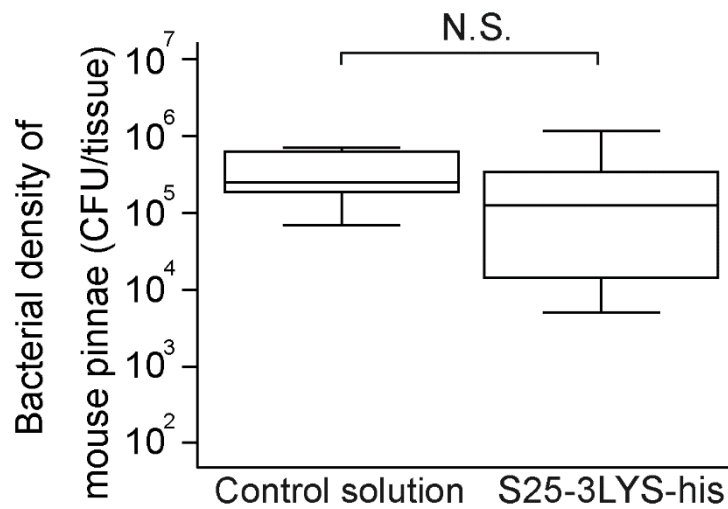

**Figure S4.** Bacterial density of mouse pinnae, measured by culture method. After collecting mouse pinnae in PBS, the PBS was cultured on tryptic soy agar. After the incubation (37°C, 2 days), bacterial density was measured. The control solution-treated group showed  $5.43 \pm 0.34 \log_{10}$  CFU/tissue (mean  $\pm$  SD;  $N = 3$ ). The S25-3LYS-his-treated group showed  $4.75 \pm 1.11 \log_{10}$  CFU/tissue (mean  $\pm$  SD;  $N = 3$ ). There was no statistical difference among these groups (Mann-Whitney U test;  $P$ , 0.0728), which is indicated by “N.S.”.
